# Supplementary material
Source: PubMed Central journal article supplement (PMC5386796)
Supplement: NIHMS852954-supplement-1.pdf [file NIHMS852954-supplement-1.pdf]

# **Unraveling Biophysical Interactions of Radiation Pneumonitis in Non-Small-Cell Lung Cancer via Bayesian Network Analysis**

Yi Luo, Issam El Naqa, Daniel L. McShan, Dipankar Ray, Ines Lohse, Martha M. Matuszak, Dawn Owen, Shruti Jolly, Theodore S. Lawrence, Feng-Ming Kong, Randall K. Ten Haken

Affiliations of authors: Department of Radiation Oncology, The University of Michigan, Ann Arbor, MI (YL, IEN, DM, DR, IL, MS, MM, DO, SJ, TL, RTH); Department of Radiation Oncology, Indiana University, Indianapolis, IN (FMK)

Correspondence to: Randall K. Ten Haken, PhD, University of Michigan, Department of Radiation Oncology, UH B2C432, SPC 5010, 1500 East Medical Center Dr., Ann Arbor, MI 48109-5010 (e-mail: [rth@med.umich.edu](mailto:rth@med.umich.edu); phone: (734) 936-8695; Fax (734) 936-7859)

## Appendix A: Patient's Features

**Table 1.** Data Description

| Categories                                       | Names                                                                                                                                                                                                                                                                                                                                                                                                                                                                                                                                                                                                                                                                                                                                                 |
|--------------------------------------------------|-------------------------------------------------------------------------------------------------------------------------------------------------------------------------------------------------------------------------------------------------------------------------------------------------------------------------------------------------------------------------------------------------------------------------------------------------------------------------------------------------------------------------------------------------------------------------------------------------------------------------------------------------------------------------------------------------------------------------------------------------------|
| Dosimetric Information (5)                       | Mean_Lung_Dose, Mean_Heart_Dose, V5, V13, V20                                                                                                                                                                                                                                                                                                                                                                                                                                                                                                                                                                                                                                                                                                         |
| Clinical Factors (13)                            | Smoking, COPD, Chemo, Gender, Adenocarcinoma, Squamous cell carcinoma, Large cell carcinoma, Poorly differentiated carcinomas, Stage, Age, GTV, KPS, Ratio of weight change                                                                                                                                                                                                                                                                                                                                                                                                                                                                                                                                                                           |
| Cytokines for pre and during treatment (30 + 30) | EGF, eotaxin, fractalkine, G-CSF, GM-CSF, IFN- $\gamma$ , IL-10, IL-12p40, IL-12p70, IL-13, IL-15, IL-17, IL-1 $\alpha$ , IL-1 $\beta$ , IL-1ra, IL-2, IL-4, IL-5, IL-6, IL-7, IL-8, IP-10, MCP-1, MIP-1 $\alpha$ , MIP-1 $\beta$ , sCD40L, TGF- $\alpha$ , TNF- $\alpha$ , VEGF, TGF- $\beta$ 1                                                                                                                                                                                                                                                                                                                                                                                                                                                      |
| miRNAs (62)                                      | Let-7a-5p, miR-100-5p, miR-106b-5p, miR-10b-5p, miR-122-5p, miR-124-3p, miR-125b-5p, miR-126-3p, miR-134, miR-143-3p, miR-146a-5p, miR-150-5p, miR-155-5p, miR-17-5p, miR-17-3p, miR-18a-5p, miR-192-5p, miR-195-5p, miR-19a-3p, miR-19b-3p, miR-200b-3p, miR-200c-3p, miR-205-5p, miR-21-5p, miR-210, miR-221-3p, miR-222-3p, miR-223-3p, miR-224-5p, miR-23a-3p, miR-25-3p, miR-27a-3p, miR-296-5p, miR-29a-3p, miR-30d-5p, miR-34a-5p, miR-375, miR-423-5p, miR-574-3p, miR-885-5p, miR-92a-3p, let-7c, miR-10a-5p, miR-128, miR-130b-3p, miR-145-5p, miR-148a-3p, miR-15a-5p, miR-193a-5p, miR-26b-5p, miR-30e-5p, miR-374a-5p, miR-7-5p, miR-103a-3p, miR-15b-5p, miR-191-5p, miR-22-3p, miR-24-3p, miR-26a-5p, miR-20a-5p, miR-93-5p, miR-16-5p |
| SNPs (60)                                        | Rs3857979, Rs235756, Rs1800587, Rs17561, Rs2070874, Rs1801275, Rs1800795, Rs4073, Rs2234671, Rs1800896, Rs3135932, Rs1800872, Rs180925, Rs11556218, Rs4760259, Rs1799983, Rs689470, Rs11939979, Rs11724777, Rs12102171, Rs6494633, Rs4776342, Rs12456284, Rs12913975, Rs12906898, Rs7227023, Rs7333607, Rs1800468, Rs1800469, Rs4803455, Rs1061622, Rs664677, Rs664143, Rs373759, Rs189037, Rs609261, Rs1800057, Rs3212961, Rs3212948, Rs11615, Rs238406, Rs13181, Rs17655, Rs1047768, Rs12917, Rs1805794, Rs1625895, Rs1042522, Rs25489, Rs25487, Rs6464268, Rs3218536, Rs1799796, Rs9293329, Rs1478486, Rs1040363, Rs2075685, Rs2228000, Rs2228001                                                                                                  |
