# Supplementary material
Source: PubMed Central journal article supplement (PMC5386796)
Supplement: NIHMS852954-supplement-3.pdf [file NIHMS852954-supplement-3.pdf]

# **Unraveling Biophysical Interactions of Radiation Pneumonitis in Non-Small-Cell Lung Cancer via Bayesian Network Analysis**

Yi Luo, Issam El Naqa, Daniel L. McShan, Dipankar Ray, Ines Lohse, Martha M. Matuszak, Dawn Owen, Shruti Jolly, Theodore S. Lawrence, Feng-Ming Kong, Randall K. Ten Haken

Affiliations of authors: Department of Radiation Oncology, The University of Michigan, Ann Arbor, MI (YL, IEN, DM, DR, IL, MS, MM, DO, SJ, TL, RTH); Department of Radiation Oncology, Indiana University, Indianapolis, IN (FMK)

Correspondence to: Randall K. Ten Haken, PhD, University of Michigan, Department of Radiation Oncology, UH B2C432, SPC 5010, 1500 East Medical Center Dr., Ann Arbor, MI 48109-5010 (e-mail: [rth@med.umich.edu](mailto:rth@med.umich.edu); phone: (734) 936-8695; Fax (734) 936-7859)

### ***Appendix C: An Example to Identify Appropriate Biophysical Interactions for RP2 Prediction***

Based on the MB of RP2, a TGF- $\beta$  biophysical pathway may include `tgf_beta1_Rs1800469` and `smad3_Rs6494633` from the category of SNP; `miR-191-5p`, `miR-223-3p` from the category of miRNA; `IL2`, `IL15` from cytokines before and during the treatment; `Mean_Lung_Dose`, `V5`, `V20` from dosimetric information, and its biophysical rules included all the relationships/connections between every two of the above variable categories. If a relationship could be identified from literature or influence of time order, it was considered as an inclusion connection; otherwise, it was an exclusion connection. For instance, a link from dose information to the slope of a cytokine change during treatment was considered as an inclusion connection. However, a link from `Mean_Lung_Dose` to a SNP was an exclusion connection, as radiation treatment cannot influence SNPs before radiotherapy.
