# Supplementary material
Source: PubMed Central journal article supplement (PMC5386796)
Supplement: NIHMS852954-supplement-4.pdf [file NIHMS852954-supplement-4.pdf]

# **Unraveling Biophysical Interactions of Radiation Pneumonitis in Non-Small-Cell Lung Cancer via Bayesian Network Analysis**

Yi Luo, Issam El Naqa, Daniel L. McShan, Dipankar Ray, Ines Lohse, Martha M. Matuszak, Dawn Owen, Shruti Jolly, Theodore S. Lawrence, Feng-Ming Kong, Randall K. Ten Haken

Affiliations of authors: Department of Radiation Oncology, The University of Michigan, Ann Arbor, MI (YL, IEN, DM, DR, IL, MS, MM, DO, SJ, TL, RTH); Department of Radiation Oncology, Indiana University, Indianapolis, IN (FMK)

Correspondence to: Randall K. Ten Haken, PhD, University of Michigan, Department of Radiation Oncology, UH B2C432, SPC 5010, 1500 East Medical Center Dr., Ann Arbor, MI 48109-5010 (e-mail: [rth@med.umich.edu](mailto:rth@med.umich.edu); phone: (734) 936-8695; Fax (734) 936-7859)

*Appendix D: BN model with dose and inflammation related clinical parameters*

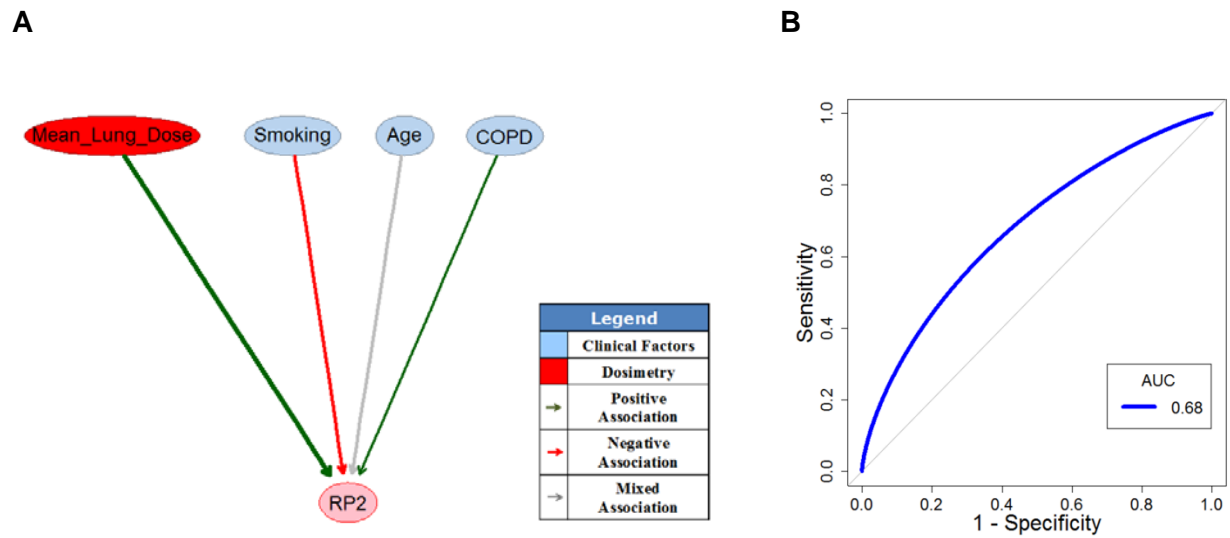

**Fig. D.** (A) BN model with dose and inflammation related clinical parameters and (B) its prediction performance based on cross validation
