# Supplementary material
Source: PubMed Central journal article supplement (PMC5386796)
Supplement: NIHMS852954-supplement-6.pdf [file NIHMS852954-supplement-6.pdf]

# **Unraveling Biophysical Interactions of Radiation Pneumonitis in Non-Small-Cell Lung Cancer via Bayesian Network**

## **Analysis**

Yi Luo, Issam El Naqa, Daniel L. McShan, Dipankar Ray, Ines Lohse, Martha M. Matuszak, Dawn Owen, Shruti Jolly, Theodore S. Lawrence, Feng-Ming Kong, Randall K. Ten Haken

Affiliations of authors: Department of Radiation Oncology, The University of Michigan, Ann Arbor, MI (YL, IEN, DM, DR, IL, MS, MM, DO, SJ, TL, RTH); Department of Radiation Oncology, Indiana University, Indianapolis, IN (FMK)

Correspondence to: Randall K. Ten Haken, PhD, University of Michigan, Department of Radiation Oncology, UH B2C432, SPC 5010, 1500 East Medical Center Dr., Ann Arbor, MI 48109-5010 (e-mail: [rth@med.umich.edu](mailto:rth@med.umich.edu); phone: (734) 936-8695; Fax (734) 936-7859)

*Appendix F: Conditional probability table to predict RP2 before and during treatment*

**Table F1.** The table of conditional probabilities  $P(\text{RP2} | \text{Lung\_gEUD}, \text{miR\_191\_5p}, \text{and pre\_IL\_15})$

|                   |                             |                     |                    |                            |                     |                    |                         |                     |                    |
|-------------------|-----------------------------|---------------------|--------------------|----------------------------|---------------------|--------------------|-------------------------|---------------------|--------------------|
| <b>Lung_gEUD</b>  | <b>[4.35, 13.6]</b>         |                     |                    |                            |                     |                    |                         |                     |                    |
| <b>miR_191_5p</b> | <b>[5.46e-05, 0.000804]</b> |                     |                    | <b>(0.000804, 0.00227]</b> |                     |                    | <b>(0.00227, 0.141]</b> |                     |                    |
| <b>pre_IL_15</b>  | <b>[0.11, 3.16]</b>         | <b>(3.16, 10.9]</b> | <b>(10.9, 340]</b> | <b>[0.11, 3.16]</b>        | <b>(3.16, 10.9]</b> | <b>(10.9, 340]</b> | <b>[0.11, 3.16]</b>     | <b>(3.16, 10.9]</b> | <b>(10.9, 340]</b> |
| <b>RP2 (No)</b>   | 99.669                      | 99.669              | 50                 | 99.669                     | 99.751              | 99.669             | 99.669                  | 66.556              | 99.02              |
| <b>RP2 (Yes)</b>  | 0.33113                     | 0.33113             | 50                 | 0.33113                    | 0.24876             | 0.33113            | 0.33113                 | 33.444              | 0.98039            |
| <b>Lung_gEUD</b>  | <b>(13.6, 17.8]</b>         |                     |                    |                            |                     |                    |                         |                     |                    |
| <b>miR_191_5p</b> | <b>[5.46e-05, 0.000804]</b> |                     |                    | <b>(0.000804, 0.00227]</b> |                     |                    | <b>(0.00227, 0.141]</b> |                     |                    |
| <b>pre_IL_15</b>  | <b>[0.11, 3.16]</b>         | <b>(3.16, 10.9]</b> | <b>(10.9, 340]</b> | <b>[0.11, 3.16]</b>        | <b>(3.16, 10.9]</b> | <b>(10.9, 340]</b> | <b>[0.11, 3.16]</b>     | <b>(3.16, 10.9]</b> | <b>(10.9, 340]</b> |
| <b>RP2 (No)</b>   | 74.876                      | 99.669              | 99.505             | 66.556                     | 0.98039             | 99.751             | 99.505                  | 25.124              | 33.444             |
| <b>RP2 (Yes)</b>  | 25.124                      | 0.33113             | 0.49505            | 33.444                     | 99.02               | 0.24876            | 0.49505                 | 74.876              | 66.556             |
| <b>Lung_gEUD</b>  | <b>(17.8, 21.2]</b>         |                     |                    |                            |                     |                    |                         |                     |                    |
| <b>miR_191_5p</b> | <b>[5.46e-05, 0.000804]</b> |                     |                    | <b>(0.000804, 0.00227]</b> |                     |                    | <b>(0.00227, 0.141]</b> |                     |                    |
| <b>pre_IL_15</b>  | <b>[0.11, 3.16]</b>         | <b>(3.16, 10.9]</b> | <b>(10.9, 340]</b> | <b>[0.11, 3.16]</b>        | <b>(3.16, 10.9]</b> | <b>(10.9, 340]</b> | <b>[0.11, 3.16]</b>     | <b>(3.16, 10.9]</b> | <b>(10.9, 340]</b> |
| <b>RP2 (No)</b>   | 99.801                      | 50                  | 50                 | 99.02                      | 99.669              | 74.876             | 0.49505                 | 99.02               | 0.16611            |
| <b>RP2 (Yes)</b>  | 0.1992                      | 50                  | 50                 | 0.98039                    | 0.33113             | 25.124             | 99.505                  | 0.98039             | 99.834             |

**Table F2.** The table of conditional probabilities  $P(\text{RP2} | \text{Lung\_gEUD}, \text{miR\_191\_5p}, \text{pre\_IL\_15}, \text{and SLP\_TGF\_beta1})$

|                      |                             |                       |                      |                       |                       |                      |                       |                       |                      |
|----------------------|-----------------------------|-----------------------|----------------------|-----------------------|-----------------------|----------------------|-----------------------|-----------------------|----------------------|
| <b>Lung_gEUD</b>     | <b>[4.35, 13.6]</b>         |                       |                      |                       |                       |                      |                       |                       |                      |
| <b>miR_191_5p</b>    | <b>[5.46e-05, 0.000804]</b> |                       |                      |                       |                       |                      |                       |                       |                      |
| <b>pre_IL_15</b>     | <b>[0.11, 3.16]</b>         |                       |                      | <b>(3.16, 10.9)</b>   |                       |                      | <b>(10.9, 340]</b>    |                       |                      |
| <b>SLP_TGF_beta1</b> | <b>[-13.5, -1.78]</b>       | <b>(-1.78, -0.21]</b> | <b>(-0.21, 6.63]</b> | <b>[-13.5, -1.78]</b> | <b>(-1.78, -0.21]</b> | <b>(-0.21, 6.63]</b> | <b>[-13.5, -1.78]</b> | <b>(-1.78, -0.21]</b> | <b>(-0.21, 6.63]</b> |
| <b>RP2 (No)</b>      | 99.02                       | 99.02                 | 99.02                | 50                    | 99.505                | 99.02                | 99.02                 | 50                    | 0.98039              |
| <b>RP2 (Yes)</b>     | 0.98039                     | 0.98039               | 0.98039              | 50                    | 0.49505               | 0.98039              | 0.98039               | 50                    | 99.02                |
| <b>Lung_gEUD</b>     | <b>[4.35, 13.6]</b>         |                       |                      |                       |                       |                      |                       |                       |                      |
| <b>miR_191_5p</b>    | <b>(0.000804, 0.00227]</b>  |                       |                      |                       |                       |                      |                       |                       |                      |
| <b>pre_IL_15</b>     | <b>[0.11, 3.16]</b>         |                       |                      | <b>(3.16, 10.9)</b>   |                       |                      | <b>(10.9, 340]</b>    |                       |                      |
| <b>SLP_TGF_beta1</b> | <b>[-13.5, -1.78]</b>       | <b>(-1.78, -0.21]</b> | <b>(-0.21, 6.63]</b> | <b>[-13.5, -1.78]</b> | <b>(-1.78, -0.21]</b> | <b>(-0.21, 6.63]</b> | <b>[-13.5, -1.78]</b> | <b>(-1.78, -0.21]</b> | <b>(-0.21, 6.63]</b> |
| <b>RP2 (No)</b>      | 50                          | 50                    | 99.669               | 99.505                | 99.02                 | 99.02                | 99.505                | 99.02                 | 50                   |
| <b>RP2 (Yes)</b>     | 50                          | 50                    | 0.33113              | 0.49505               | 0.98039               | 0.98039              | 0.49505               | 0.98039               | 50                   |
| <b>Lung_gEUD</b>     | <b>[4.35, 13.6]</b>         |                       |                      |                       |                       |                      |                       |                       |                      |
| <b>miR_191_5p</b>    | <b>(0.00227, 0.141]</b>     |                       |                      |                       |                       |                      |                       |                       |                      |
| <b>pre_IL_15</b>     | <b>[0.11, 3.16]</b>         |                       |                      | <b>(3.16, 10.9)</b>   |                       |                      | <b>(10.9, 340]</b>    |                       |                      |
| <b>SLP_TGF_beta1</b> | <b>[-13.5, -1.78]</b>       | <b>(-1.78, -0.21]</b> | <b>(-0.21, 6.63]</b> | <b>[-13.5, -1.78]</b> | <b>(-1.78, -0.21]</b> | <b>(-0.21, 6.63]</b> | <b>[-13.5, -1.78]</b> | <b>(-1.78, -0.21]</b> | <b>(-0.21, 6.63]</b> |
| <b>RP2 (No)</b>      | 99.02                       | 99.02                 | 99.02                | 66.556                | 50                    | 50                   | 99.02                 | 50                    | 50                   |
| <b>RP2 (Yes)</b>     | 0.98039                     | 0.98039               | 0.98039              | 33.444                | 50                    | 50                   | 0.98039               | 50                    | 50                   |
| <b>Lung_gEUD</b>     | <b>(13.6, 17.8]</b>         |                       |                      |                       |                       |                      |                       |                       |                      |
| <b>miR_191_5p</b>    | <b>[5.46e-05, 0.000804]</b> |                       |                      |                       |                       |                      |                       |                       |                      |
| <b>pre_IL_15</b>     | <b>[0.11, 3.16]</b>         |                       |                      | <b>(3.16, 10.9)</b>   |                       |                      | <b>(10.9, 340]</b>    |                       |                      |
| <b>SLP_TGF_beta1</b> | <b>[-13.5, -1.78]</b>       | <b>(-1.78, -0.21]</b> | <b>(-0.21, 6.63]</b> | <b>[-13.5, -1.78]</b> | <b>(-1.78, -0.21]</b> | <b>(-0.21, 6.63]</b> | <b>[-13.5, -1.78]</b> | <b>(-1.78, -0.21]</b> | <b>(-0.21, 6.63]</b> |
| <b>RP2 (No)</b>      | 50                          | 50                    | 99.505               | 99.02                 | 99.505                | 50                   | 50                    | 99.505                | 50                   |
| <b>RP2 (Yes)</b>     | 50                          | 50                    | 0.49505              | 0.98039               | 0.49505               | 50                   | 50                    | 0.49505               | 50                   |
| <b>Lung_gEUD</b>     | <b>(13.6, 17.8]</b>         |                       |                      |                       |                       |                      |                       |                       |                      |
| <b>miR_191_5p</b>    | <b>(0.000804, 0.00227]</b>  |                       |                      |                       |                       |                      |                       |                       |                      |

|                      |                             |                       |                      |                       |                       |                      |                       |                       |                      |
|----------------------|-----------------------------|-----------------------|----------------------|-----------------------|-----------------------|----------------------|-----------------------|-----------------------|----------------------|
| <b>pre_IL_15</b>     | <b>[0.11, 3.16]</b>         |                       |                      | <b>(3.16, 10.9)</b>   |                       |                      | <b>(10.9, 340)</b>    |                       |                      |
| <b>SLP_TGF_beta1</b> | <b>[-13.5, -1.78]</b>       | <b>(-1.78, -0.21)</b> | <b>(-0.21, 6.63)</b> | <b>[-13.5, -1.78]</b> | <b>(-1.78, -0.21)</b> | <b>(-0.21, 6.63)</b> | <b>[-13.5, -1.78]</b> | <b>(-1.78, -0.21)</b> | <b>(-0.21, 6.63)</b> |
| <b>RP2 (No)</b>      | 99.505                      | 0.98039               | 50                   | 0.98039               | 50                    | 50                   | 99.02                 | 99.505                | 99.02                |
| <b>RP2 (Yes)</b>     | 0.49505                     | 99.02                 | 50                   | 99.02                 | 50                    | 50                   | 0.98039               | 0.49505               | 0.98039              |
| <b>Lung_gEUD</b>     | <b>(13.6, 17.8)</b>         |                       |                      |                       |                       |                      |                       |                       |                      |
| <b>miR_191_5p</b>    | <b>(0.00227, 0.141)</b>     |                       |                      |                       |                       |                      |                       |                       |                      |
| <b>pre_IL_15</b>     | <b>[0.11, 3.16]</b>         |                       |                      | <b>(3.16, 10.9)</b>   |                       |                      | <b>(10.9, 340)</b>    |                       |                      |
| <b>SLP_TGF_beta1</b> | <b>[-13.5, -1.78]</b>       | <b>(-1.78, -0.21)</b> | <b>(-0.21, 6.63)</b> | <b>[-13.5, -1.78]</b> | <b>(-1.78, -0.21)</b> | <b>(-0.21, 6.63)</b> | <b>[-13.5, -1.78]</b> | <b>(-1.78, -0.21)</b> | <b>(-0.21, 6.63)</b> |
| <b>RP2 (No)</b>      | 99.02                       | 99.02                 | 50                   | 0.98039               | 0.49505               | 99.02                | 50                    | 50                    | 33.444               |
| <b>RP2 (Yes)</b>     | 0.98039                     | 0.98039               | 50                   | 99.02                 | 99.505                | 0.98039              | 50                    | 50                    | 66.556               |
| <b>Lung_gEUD</b>     | <b>(17.8, 21.2)</b>         |                       |                      |                       |                       |                      |                       |                       |                      |
| <b>miR_191_5p</b>    | <b>[5.46e-05, 0.000804]</b> |                       |                      |                       |                       |                      |                       |                       |                      |
| <b>pre_IL_15</b>     | <b>[0.11, 3.16]</b>         |                       |                      | <b>(3.16, 10.9)</b>   |                       |                      | <b>(10.9, 340)</b>    |                       |                      |
| <b>SLP_TGF_beta1</b> | <b>[-13.5, -1.78]</b>       | <b>(-1.78, -0.21)</b> | <b>(-0.21, 6.63)</b> | <b>[-13.5, -1.78]</b> | <b>(-1.78, -0.21)</b> | <b>(-0.21, 6.63)</b> | <b>[-13.5, -1.78]</b> | <b>(-1.78, -0.21)</b> | <b>(-0.21, 6.63)</b> |
| <b>RP2 (No)</b>      | 50                          | 99.02                 | 99.751               | 0.98039               | 99.505                | 0.98039              | 50                    | 50                    | 50                   |
| <b>RP2 (Yes)</b>     | 50                          | 0.98039               | 0.24876              | 99.02                 | 0.49505               | 99.02                | 50                    | 50                    | 50                   |
| <b>Lung_gEUD</b>     | <b>(17.8, 21.2)</b>         |                       |                      |                       |                       |                      |                       |                       |                      |
| <b>miR_191_5p</b>    | <b>(0.000804, 0.00227)</b>  |                       |                      |                       |                       |                      |                       |                       |                      |
| <b>pre_IL_15</b>     | <b>[0.11, 3.16]</b>         |                       |                      | <b>(3.16, 10.9)</b>   |                       |                      | <b>(10.9, 340)</b>    |                       |                      |
| <b>SLP_TGF_beta1</b> | <b>[-13.5, -1.78]</b>       | <b>(-1.78, -0.21)</b> | <b>(-0.21, 6.63)</b> | <b>[-13.5, -1.78]</b> | <b>(-1.78, -0.21)</b> | <b>(-0.21, 6.63)</b> | <b>[-13.5, -1.78]</b> | <b>(-1.78, -0.21)</b> | <b>(-0.21, 6.63)</b> |
| <b>RP2 (No)</b>      | 50                          | 99.02                 | 50                   | 99.505                | 99.02                 | 50                   | 99.505                | 99.02                 | 0.98039              |
| <b>RP2 (Yes)</b>     | 50                          | 0.98039               | 50                   | 0.49505               | 0.98039               | 50                   | 0.49505               | 0.98039               | 99.02                |
| <b>Lung_gEUD</b>     | <b>(17.8, 21.2)</b>         |                       |                      |                       |                       |                      |                       |                       |                      |
| <b>miR_191_5p</b>    | <b>(0.00227, 0.141)</b>     |                       |                      |                       |                       |                      |                       |                       |                      |
| <b>pre_IL_15</b>     | <b>[0.11, 3.16]</b>         |                       |                      | <b>(3.16, 10.9)</b>   |                       |                      | <b>(10.9, 340)</b>    |                       |                      |
| <b>SLP_TGF_beta1</b> | <b>[-13.5, -1.78]</b>       | <b>(-1.78, -0.21)</b> | <b>(-0.21, 6.63)</b> | <b>[-13.5, -1.78]</b> | <b>(-1.78, -0.21)</b> | <b>(-0.21, 6.63)</b> | <b>[-13.5, -1.78]</b> | <b>(-1.78, -0.21)</b> | <b>(-0.21, 6.63)</b> |
| <b>RP2 (No)</b>      | 50                          | 0.98039               | 0.98039              | 50                    | 99.02                 | 50                   | 0.98039               | 0.98039               | 0.24876              |
| <b>RP2 (Yes)</b>     | 50                          | 99.02                 | 99.02                | 50                    | 0.98039               | 50                   | 99.02                 | 99.02                 | 99.751               |
