# Supplementary material
Source: PubMed Central journal article supplement (PMC5386796)
Supplement: NIHMS852954-supplement-7.pdf [file NIHMS852954-supplement-7.pdf]

# **Unraveling Biophysical Interactions of Radiation Pneumonitis in Non-Small-Cell Lung Cancer via Bayesian Network Analysis**

Yi Luo, Issam El Naqa, Daniel L. McShan, Dipankar Ray, Ines Lohse, Martha M. Matuszak, Dawn Owen, Shruti Jolly, Theodore S. Lawrence, Feng-Ming Kong, Randall K. Ten Haken

Affiliations of authors: Department of Radiation Oncology, The University of Michigan, Ann Arbor, MI (YL, IEN, DM, DR, IL, MS, MM, DO, SJ, TL, RTH); Department of Radiation Oncology, Indiana University, Indianapolis, IN (FMK)

Correspondence to: Randall K. Ten Haken, PhD, University of Michigan, Department of Radiation Oncology, UH B2C432, SPC 5010, 1500 East Medical Center Dr., Ann Arbor, MI 48109-5010 (e-mail: [rth@med.umich.edu](mailto:rth@med.umich.edu); phone: (734) 936-8695; Fax (734) 936-7859)

*Appendix G. Comparisons of BN features used between the training and testing cohorts*

**Table 2.** Comparisons of the used features in BN between two cohorts

| Cohorts                                   | Properties | The used features in BN |                         |                         |                     |                   |                       |
|-------------------------------------------|------------|-------------------------|-------------------------|-------------------------|---------------------|-------------------|-----------------------|
|                                           |            | nos3_<br>Rs1799983      | tgf_beta1_<br>Rs1800469 | tgf_beta1_<br>Rs4803455 | smad3_<br>Rs6494633 | Mean_Lung_Dose    |                       |
| Training                                  | Range      | [0, 2]                  | [0, 2]                  | [0, 2]                  | [0, 2]              | [4.35, 21.18]     |                       |
|                                           | Median     | 1                       | 1                       | 1                       | 1                   | 15.51             |                       |
| Testing                                   | Range      | [0, 2]                  | [0, 2]                  | [0, 2]                  | [0, 2]              | [3.17, 20.48]     |                       |
|                                           | Median     | 1                       | 1                       | 1                       | 1                   | 13.92             |                       |
| Mann-Whitney's test<br>( <i>p</i> -value) |            | <b>0.17</b>             | <b>0.06</b>             | <b>0.17</b>             | <b>0.96</b>         | <b>0.015</b>      |                       |
| Cohorts                                   | Properties | The used features in BN |                         |                         |                     |                   |                       |
|                                           |            | miR_223_3p              | miR_191_5p              | pre_IL_15               | pre_IL_2            | SLP_TGF<br>_beta1 | SLP_IFN<br>_gamma     |
| Training                                  | Range      | [0, 2.5]                | [0, 0.14]               | [0.11,<br>339.63]       | [0.04,<br>312.22]   | [-13.50,<br>6.64] | [-315.55,<br>30.58]   |
|                                           | Median     | 0.01                    | 0.00                    | 6.20                    | 4.97                | -0.66             | -0.39                 |
| Testing                                   | Range      | [0, 0.09]               | [0, 0.02]               | [0.11, 98.48]           | [0.04,<br>516.44]   | [-5.04,<br>2.70]  | [-302.88,<br>1382.29] |
|                                           | Median     | 0.00                    | 0.00                    | 6.08                    | 2.68                | 0.08              | -1.03                 |
| Mann-Whitney's test<br>( <i>p</i> -value) |            | <b>0.13</b>             | <b>0.50</b>             | <b>0.88</b>             | <b>0.16</b>         | <b>0.02</b>       | <b>0.47</b>           |
